# Supplementary material
Source: PubMed Central journal article supplement (PMC3597093)

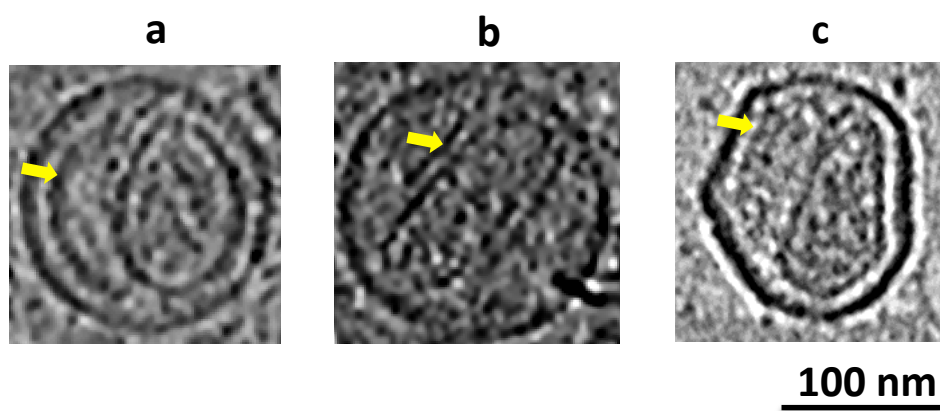

**Supplementary Fig. 1**

Supplement: NIHMS415192-supplement-06.pdf [file NIHMS415192-supplement-06.pdf]

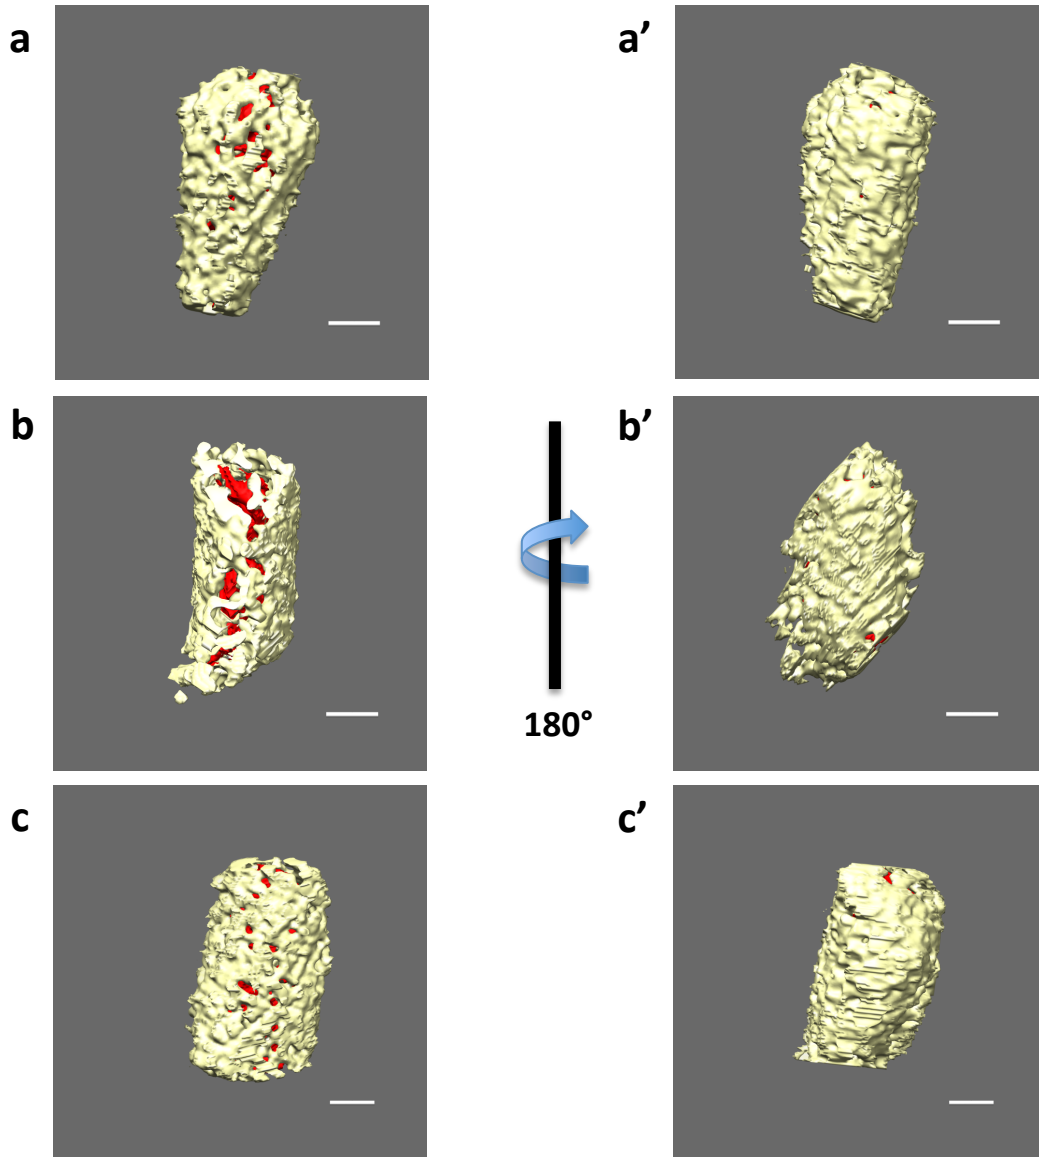

Supplementary Fig. 2

Supplement: NIHMS415192-supplement-07.pdf [file NIHMS415192-supplement-07.pdf]
